# Supplementary material for: A polydopamine coating enabling the stable cycling of MnO2 cathode materials in aqueous zinc batteries
Source: Royal Society of Chemistry journal article supplement (doi:10.1039/d3sc06096a), 2024-01-01
Supplement: d3sc06096a1.pdf [file d3sc06096a1.pdf]

## Electronic Supplementary Information

### A polydopamine coating enabling the stable cycling of MnO<sub>2</sub> cathode materials in aqueous zinc batteries

Guoli Zhang<sup>a</sup>, Jiaqi Zhu<sup>a</sup>, Lu Lin<sup>a</sup>, Yaozhi Liu<sup>a</sup>, Shuo Li<sup>a</sup>, Qianrui Li<sup>a</sup>, Xiao-Xia Liu<sup>a,b,c,\*</sup> and Xiaoqi Sun<sup>a,b,\*</sup>

<sup>a</sup>. Department of Chemistry, Northeastern University, Shenyang 110819, China.

<sup>b</sup>. National Frontiers Science Center for Industrial Intelligence and Systems Optimization, Northeastern University, 3-11 Wenhua Road, Shenyang, 110819, China.

<sup>c</sup>. Key Laboratory of Data Analytics and Optimization for Smart Industry (Northeastern University), Ministry of Education, China.

\*Corresponding authors. E-mail: xxliu@mail.neu.edu.cn; sunxiaoqi@mail.neu.edu.cn

## 1 Experimental section

### 1.1 Material synthesis

MnO<sub>2</sub> and MnO<sub>2</sub>/PDA materials were obtained with the modified steps of previous studies.<sup>1,2</sup> Typically, 0.35 g KMnO<sub>4</sub> was dissolved in 35 mL deionized water, and 3.3 mL HCl (36%~38%) was added. The mixture was stirred for 10 min, transferred into a 50 mL Teflon-lined stainless-steel autoclave, and heated at 140 °C for 16 h. The MnO<sub>2</sub> product was collected by centrifugation, washed with deionized water and ethanol for three times, respectively, and dried at 60 °C overnight. To obtain PDA coating, the above MnO<sub>2</sub> product without drying was dispersed and sonicated for 10 min in 50 mL buffer solution of 40 mg PEO-PPO-PEO (P123) triblock copolymer and 60 mg 2-amino-2-(hydroxymethyl)-1,3-propanedio (Tris). Subsequently, 20 mg dopamine hydrochloride was added and the mixture was stirred for 10 h at room temperature. The product was collected by centrifugation, washed with deionized water and ethanol for three times, respectively, and dried at 60 °C overnight. The solid was finally heated at 300 °C for 5 h under Ar to obtain the MnO<sub>2</sub>/PDA product.

### 1.2 Characterizations

X-ray diffraction (XRD) was carried out on a PANalytical Empyrean diffractometer with Cu-K $\alpha$  radiation. The morphologies were investigated by HITACHI SU 8010 scanning electron microscope. The high-resolution transmission electron microscopy (HRTEM) images were recorded on a JEM-ARM200F transmission electron microscope. Raman spectra were performed on a confocal laser micro-Raman spectrometer (XPLORA, HORIBA Scientific, France) with an excitation wavelength of 532 nm. X-ray photoelectron spectroscopy (XPS) was measured on an XPS spectrometer (ESCALAB 250Xi, Thermo Scientific Escalab, USA) with Al-K $\alpha$  radiation (8.34 Å) as the excitation source. The data was analyzed using Avantage software and calibrated by referencing the C 1s peak to 284.8 eV. The Fourier transform infrared spectroscopy (FT-IR) was conducted with a Vertex-70 spectrometer (BRUKER, Germany). The Mn concentrations in electrolytes were measured by inductively coupled plasma optical emission spectroscopy (ICP-OES) on a PerkinElmer 8300 instrument. Thermogravimetric analysis (TGA) was performed on a thermogravimetric analyzer (TA Instruments TAG Q500/MS Discovery) at a heating rate of 5 °C min<sup>-1</sup> in an air atmosphere. Gel permeation chromatography (GPC) measurements were performed by PL GPC 50. Zeta potential was measured by a Nanoparticle size analyzer (Nano-S90). The powder was dispersed in the H<sub>2</sub>SO<sub>4</sub> solutions with the pH of 4.3, which was the same as the 1 M ZnSO<sub>4</sub> electrolyte. The cathodes and electrolytes for ex-situ characterizations were cycled at 0.1 A g<sup>-1</sup> for 20 cycles, and then charged/discharged to the destined states.

### **1.3 Electrochemical measurements**

The cathodes were prepared by mixing the MnO<sub>2</sub>/PDA or MnO<sub>2</sub> active material with Ketjen black and PVDF at a mass ratio of 7:2:1 in NMP solvent. The slurry was dropped casted on carbon paper substrate and dried at 90 °C under vacuum for 12 hours. Coin cells were assembled with filter paper separators. Galvanostatic charge/discharge tests were carried out with the voltage window of 0.8 V-2.0 V. Electrochemical impedance spectroscopy (EIS) was performed with 5 mV amplitudes in the frequency range of 300 kHz to 100 mHz in T-shaped three-electrode PFA Swagelok cells with saturated calomel electrode (SCE) as the reference. All electrochemical measurements were carried out on the LAND or Biologic VMP3 battery test systems.

## 2 Supplementary Figures

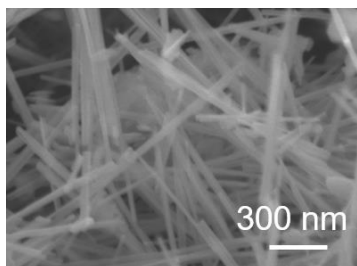

**Figure S1.** SEM image of MnO<sub>2</sub>.

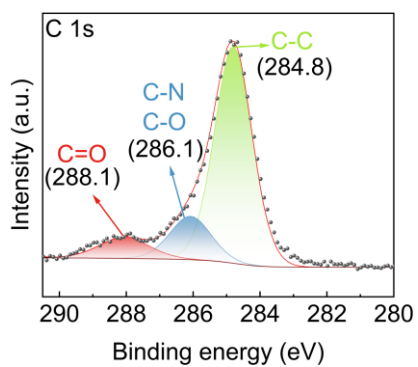

**Figure S2.** C 1s XPS of MnO<sub>2</sub>/PDA.

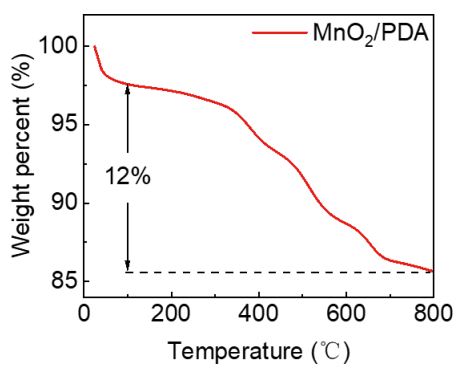

**Figure S3.** TGA of MnO<sub>2</sub>/PDA.

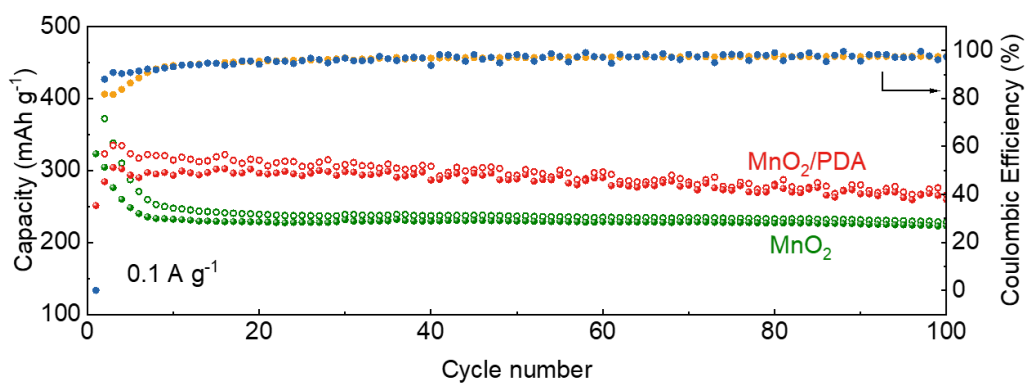

**Figure S4.** Cycling performance of MnO<sub>2</sub> and MnO<sub>2</sub>/PDA at 0.1 A g<sup>-1</sup>.

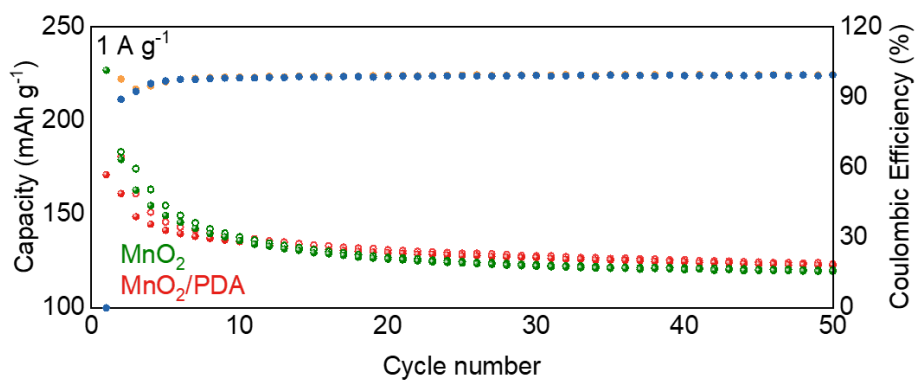

**Figure S5.** The enlarged figure for the early 50 cycles of MnO<sub>2</sub> and MnO<sub>2</sub>/PDA at 1 A g<sup>-1</sup>.

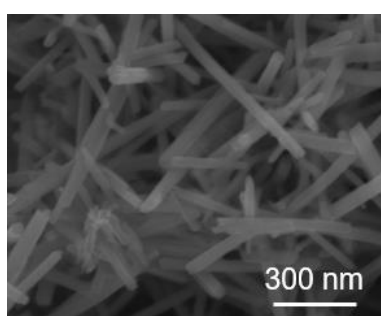

**Figure S6.** SEM image of MnO<sub>2</sub>/PDA after 1000 cycles at 1 A g<sup>-1</sup>.

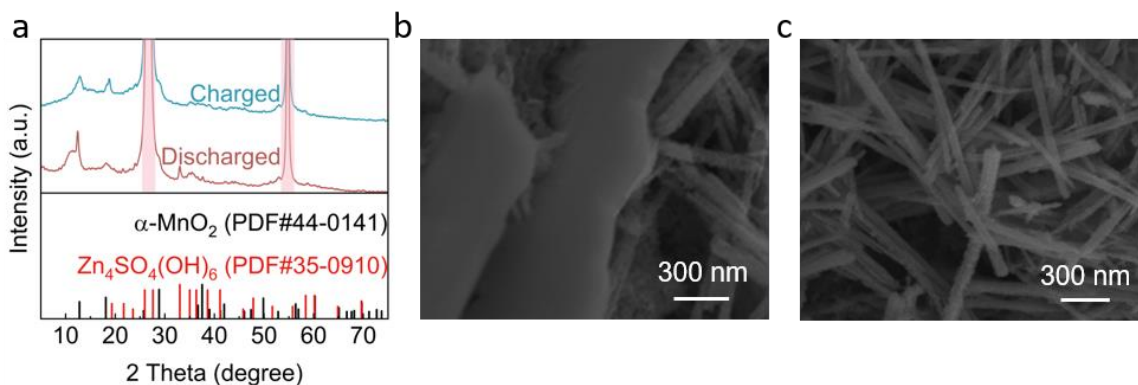

**Figure S7.** a) XRD patterns of the MnO<sub>2</sub> cathode at different states. SEM images of the b) discharged and c) charged MnO<sub>2</sub> cathode.

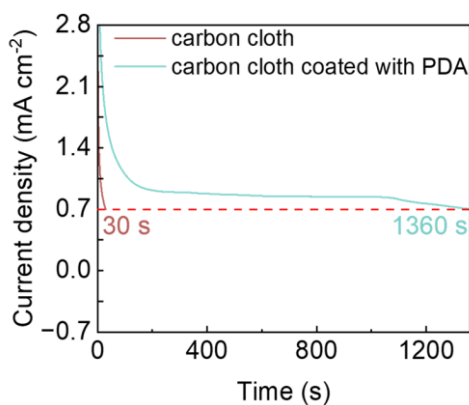

**Figure S8.** Current response of different cathodes with 2 V constant voltage hold in the 1 M ZnSO<sub>4</sub> + 0.1 M MnSO<sub>4</sub> electrolyte.

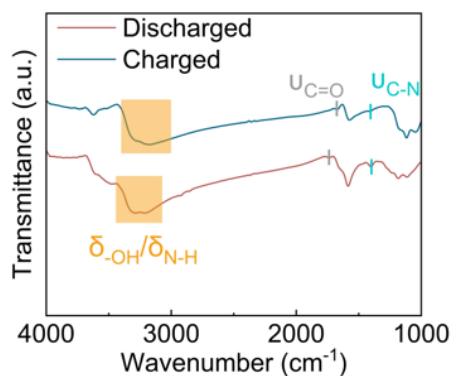

**Figure S9.** FT-IR of MnO<sub>2</sub>/PDA at different states.

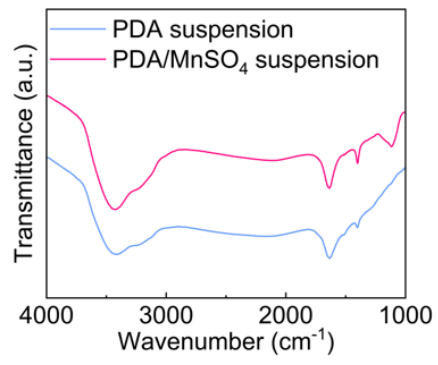

**Figure S10.** FT-IR of PDA suspension in water and MnSO<sub>4</sub> solution.

### 3 References

1. W. Chen, R. B. Rakhi, H. N. Alshareef, *J. Mater. Chem. A*, 2013, **1**, 3315-3324.
2. H. Jiang, Y. Hu, S. Guo, C. Yan, P. S. Lee, C. Li, *ACS Nano*, 2014, **8**, 6038-6046.
